# Supplementary material for: Transcriptome Alteration in the Diabetic Heart by Rosiglitazone: Implications for Cardiovascular Mortality
Source: PLoS One. 2008 Jul 9;3(7):e2609. doi: 10.1371/journal.pone.0002609 (PMC2481284; doi:10.1371/journal.pone.0002609)
Supplement: Table S1 — Upregulated Gene Ontology pathways with rosiglitazone-treated db/db mice. (0.03 MB RTF) [file pone.0002609.s001.xls]

## Sheet: Rosi Up
Supplemental Table S1: Upregulated pathways with rosiglitazone-treated db/db mice
GO Category	TOTAL GENES	OVER-EXPRESSED GENES	ENRICHMENT	LOG10(p)	FALSE DISCOVERY RATE
GO:0050875 cellular physiological process	10110	206	1.14775	-5.39463	0
GO:0001574 ganglioside biosynthesis	4	2	28.1645	-2.73541	1.485
GO:0006612 protein targeting to membrane	30	4	7.51053	-2.7339	1.00667
GO:0006672 ceramide metabolism	32	4	7.04113	-2.62794	0.9225
GO:0046903 secretion	488	18	2.07771	-2.56134	0.804
GO:0046519 sphingoid metabolism	35	4	6.4376	-2.48278	0.871667
GO:0006613 cotranslational protein targeting to membrane	18	3	9.38817	-2.43175	0.79
GO:0045045 secretory pathway	388	15	2.17767	-2.40191	0.70875
GO:0044267 cellular protein metabolism	3157	74	1.32035	-2.37493	0.648889
GO:0051146 striated muscle cell differentiation	6	2	18.7763	-2.34768	0.707
GO:0044260 cellular macromolecule metabolism	3218	75	1.31283	-2.34072	0.644545
GO:0006887 exocytosis	149	8	3.02438	-2.2917	0.615
GO:0051258 protein polymerization	63	5	4.47056	-2.28874	0.569231
GO:0030833 regulation of actin filament polymerization	21	3	8.047	-2.2366	0.526667
GO:0045047 protein targeting to ER	21	3	8.047	-2.2366	0.526667
GO:0015031 protein transport	824	25	1.70901	-2.21533	0.508125
GO:0045184 establishment of protein localization	875	26	1.67378	-2.17065	0.556471
GO:0007105 cytokinesis site selection	8	2	14.0823	-2.0868	0.644444
GO:0008104 protein localization	936	27	1.62488	-2.07154	0.614737
GO:0030258 lipid modification	24	3	7.04113	-2.0712	0.594
GO:0001573 ganglioside metabolism	9	2	12.5176	-1.98274	0.668095
GO:0046907 intracellular transport	959	27	1.5859	-1.94043	0.665455
GO:0001570 vasculogenesis	27	3	6.25878	-1.92819	0.649565
GO:0051641 cellular localization	1012	28	1.55851	-1.90096	0.635417
GO:0006013 mannose metabolism	10	2	11.2658	-1.89091	0.646154
GO:0000122 negative regulation of transcription from RNA polymerase II promoter	183	8	2.46247	-1.78248	0.768148
GO:0051649 establishment of cellular localization	990	27	1.53625	-1.77461	0.745357
GO:0030397 membrane disassembly	1	1	56.329	-1.75073	0.924222
GO:0044240 organismal lipid catabolism	1	1	56.329	-1.75073	0.924222
GO:0044243 organismal catabolism	1	1	56.329	-1.75073	0.924222
GO:0045016 mitochondrial magnesium ion transport	1	1	56.329	-1.75073	0.924222
GO:0051081 nuclear envelope disassembly	1	1	56.329	-1.75073	0.924222
GO:0043412 biopolymer modification	1863	45	1.3606	-1.74514	0.905652
GO:0006688 glycosphingolipid biosynthesis	12	2	9.38817	-1.7347	0.84451
GO:0006911 phagocytosis engulfment	12	2	9.38817	-1.7347	0.84451
GO:0016054 organic acid catabolism	12	2	9.38817	-1.7347	0.84451
GO:0030301 cholesterol transport	12	2	9.38817	-1.7347	0.84451
GO:0046395 carboxylic acid catabolism	12	2	9.38817	-1.7347	0.84451
GO:0019538 protein metabolism	3472	76	1.23301	-1.69261	0.846538
GO:0007250 activation of NF-kappaB-inducing kinase	13	2	8.666	-1.6672	0.852963
GO:0051048 negative regulation of secretion	13	2	8.666	-1.6672	0.852963
GO:0008064 regulation of actin polymerization and or depolymerization	60	4	3.75527	-1.66257	0.840182
GO:0016043 cell organization and biogenesis	2597	59	1.27971	-1.65698	0.827143
GO:0006810 transport	2757	62	1.26674	-1.64099	0.821579
GO:0006464 protein modification	1794	43	1.35014	-1.63223	0.809655
GO:0016192 vesicle-mediated transport	608	18	1.66763	-1.63028	0.79661
GO:0006665 sphingolipid metabolism	62	4	3.63413	-1.61596	0.792
GO:0030832 regulation of actin filament length	63	4	3.57645	-1.59336	0.812131
GO:0018193 peptidyl-amino acid modification	127	6	2.66121	-1.59024	0.806452
GO:0000080 G1 phase of mitotic cell cycle	37	3	4.56722	-1.55994	0.800938
GO:0051318 G1 phase	37	3	4.56722	-1.55994	0.800938
GO:0018212 peptidyl-tyrosine modification	65	4	3.4664	-1.54954	0.784394
GO:0006273 lagging strand elongation	15	2	7.51053	-1.54819	0.762143
GO:0015918 sterol transport	15	2	7.51053	-1.54819	0.762143
GO:0016579 protein deubiquitination	15	2	7.51053	-1.54819	0.762143
GO:0017015 regulation of transforming growth factor beta receptor signaling pathway	15	2	7.51053	-1.54819	0.762143
GO:0051301 cell division	282	10	1.99748	-1.53433	0.75662
GO:0030041 actin filament polymerization	38	3	4.44703	-1.5298	0.752778
GO:0051179 localization	3322	72	1.22086	-1.52112	0.748082
GO:0006793 phosphorus metabolism	950	25	1.48234	-1.51082	0.732667
GO:0006796 phosphate metabolism	950	25	1.48234	-1.51082	0.732667
GO:0044237 cellular metabolism	7189	142	1.11263	-1.50211	0.728553
GO:0031324 negative regulation of cellular metabolism	455	14	1.7332	-1.4875	0.742857
GO:0007049 cell cycle	1007	26	1.45437	-1.46583	0.749231
GO:0006478 peptidyl-tyrosine sulfation	2	1	28.1645	-1.45356	0.82099
GO:0009450 gamma-aminobutyric acid catabolism	2	1	28.1645	-1.45356	0.82099
GO:0009720 detection of hormone stimulus	2	1	28.1645	-1.45356	0.82099
GO:0009726 detection of endogenous stimulus	2	1	28.1645	-1.45356	0.82099
GO:0015693 magnesium ion transport	2	1	28.1645	-1.45356	0.82099
GO:0018153 isopeptide cross-linking via N6-(L-isoglutamyl)-L-lysine	2	1	28.1645	-1.45356	0.82099
GO:0018199 peptidyl-glutamine modification	2	1	28.1645	-1.45356	0.82099
GO:0018262 isopeptide cross-linking	2	1	28.1645	-1.45356	0.82099
GO:0018350 protein amino acid esterification	2	1	28.1645	-1.45356	0.82099
GO:0030511 positive regulation of transforming growth factor beta receptor signaling pathway	2	1	28.1645	-1.45356	0.82099
GO:0031115 negative regulation of microtubule polymerization	2	1	28.1645	-1.45356	0.82099
GO:0031122 cytoplasmic microtubule organization and biogenesis	2	1	28.1645	-1.45356	0.82099
GO:0031334 positive regulation of protein complex assembly	2	1	28.1645	-1.45356	0.82099
GO:0042373 vitamin K metabolism	2	1	28.1645	-1.45356	0.82099
GO:0043536 positive regulation of blood vessel endothelial cell migration	2	1	28.1645	-1.45356	0.82099
GO:0046359 butyrate catabolism	2	1	28.1645	-1.45356	0.82099
GO:0006360 transcription from RNA polymerase I promoter	17	2	6.62694	-1.44589	0.815288
GO:0009247 glycolipid biosynthesis	17	2	6.62694	-1.44589	0.815288
GO:0046839 phospholipid dephosphorylation	17	2	6.62694	-1.44589	0.815288
GO:0017157 regulation of exocytosis	41	3	4.12163	-1.44487	0.810381
GO:0051128 regulation of cell organization and biogenesis	103	5	2.73442	-1.43865	0.804623
GO:0016481 negative regulation of transcription	377	12	1.79297	-1.43271	0.799159
GO:0009892 negative regulation of metabolism	512	15	1.65026	-1.40125	0.801019
GO:0051234 establishment of localization	3271	70	1.20545	-1.37569	0.800901
GO:0006873 cell ion homeostasis	220	8	2.04833	-1.36906	0.796786
GO:0006687 glycosphingolipid metabolism	19	2	5.92937	-1.35645	0.804513
GO:0043123 positive regulation of I-kappaB kinase NF-kappaB cascade	75	4	3.00421	-1.35408	0.799649
GO:0006470 protein amino acid dephosphorylation	145	6	2.33086	-1.35026	0.793565
GO:0048167 regulation of synaptic plasticity	45	3	3.75527	-1.34282	0.792155
GO:0030036 actin cytoskeleton organization and biogenesis	265	9	1.91306	-1.32682	0.792051
GO:0007062 sister chromatid cohesion	20	2	5.6329	-1.3157	0.806864
GO:0009987 cellular process	12281	224	1.02742	-1.31463	0.80042
