# Supplementary material for: Transcriptome Alteration in the Diabetic Heart by Rosiglitazone: Implications for Cardiovascular Mortality
Source: PLoS One. 2008 Jul 9;3(7):e2609. doi: 10.1371/journal.pone.0002609 (PMC2481284; doi:10.1371/journal.pone.0002609)
Supplement: Table S2 — Downregulated Gene Ontology pathways with rosiglitazone-treated db/db mice. (0.02 MB RTF) [file pone.0002609.s002.xls]

## Sheet: Sheet1
Supplemental Table S2: Downregulated pathways with rosiglitazone-treated db/db mice
GO Category	TOTAL GENES	UNDER-EXPRESSED GENES	ENRICHMENT	LOG10(p)	FALSE DISCOVERY RATE
GO:0016082 synaptic vesicle priming	3	1	433.733	-2.63752	1.17
GO:0007194 negative regulation of adenylate cyclase activity	17	1	76.5412	-1.8863	1.25083
GO:0031280 negative regulation of cyclase activity	17	1	76.5412	-1.8863	1.25083
GO:0051350 negative regulation of lyase activity	17	1	76.5412	-1.8863	1.25083
GO:0006457 protein folding	253	2	10.2862	-1.81565	1.28077
GO:0007193 G-protein signaling adenylate cyclase inhibiting pathway	23	1	56.5739	-1.75592	1.30143
GO:0007215 glutamate signaling pathway	26	1	50.0462	-1.70312	1.31533
GO:0006626 protein targeting to mitochondrion	27	1	48.1926	-1.68688	1.25562
GO:0031023 microtubule organizing center organization and biogenesis	28	1	46.4714	-1.67124	1.20765
GO:0016079 synaptic vesicle exocytosis	34	1	38.2706	-1.58782	1.31167
GO:0007268 synaptic transmission	401	2	6.48978	-1.44136	1.40857
GO:0007588 excretion	49	1	26.5551	-1.43135	1.38182
GO:0045761 regulation of adenylate cyclase activity	50	1	26.024	-1.42272	1.33696
GO:0031279 regulation of cyclase activity	52	1	25.0231	-1.40599	1.22346
GO:0051339 regulation of lyase activity	52	1	25.0231	-1.40599	1.22346
GO:0006952 defense response	1046	3	3.73193	-1.39242	1.2
GO:0048489 synaptic vesicle transport	66	1	19.7152	-1.30455	1.23433
