# Supplementary material for: Transcriptome Alteration in the Diabetic Heart by Rosiglitazone: Implications for Cardiovascular Mortality
Source: PLoS One. 2008 Jul 9;3(7):e2609. doi: 10.1371/journal.pone.0002609 (PMC2481284; doi:10.1371/journal.pone.0002609)
Supplement: Table S3 — Upregulated Gene Ontology pathways in untreated db/db mice. (0.04 MB RTF) [file pone.0002609.s003.xls]

## Sheet: Sheet1
Supplemental Table S3: Upregulated pathways in untreated db/db mice
GO Category	TOTAL GENES	OVER-EXPRESSED GENES	ENRICHMENT	LOG10(p)	FALSE DISCOVERY RATE
GO:0008152 metabolism	7600	320	1.248	-10.0079	0
GO:0044237 cellular metabolism	7189	300	1.23689	-8.07713	0
GO:0044255 cellular lipid metabolism	638	49	2.27643	-7.25458	0
GO:0050875 cellular physiological process	10110	384	1.1258	-7.12111	0
GO:0044238 primary metabolism	6971	289	1.2288	-7.10485	0
GO:0006629 lipid metabolism	742	53	2.11715	-6.78385	0
GO:0006631 fatty acid metabolism	197	23	3.46052	-6.67711	0
GO:0019752 carboxylic acid metabolism	621	42	2.00464	-4.87412	0.0025
GO:0006082 organic acid metabolism	623	42	1.99821	-4.84055	0.002222
GO:0007031 peroxisome organization and biogenesis	31	7	6.69292	-4.20936	0.008
GO:0044267 cellular protein metabolism	3157	141	1.3238	-4.04109	0.007273
GO:0044260 cellular macromolecule metabolism	3218	143	1.31713	-3.99453	0.0075
GO:0019538 protein metabolism	3472	151	1.28907	-3.76066	0.013846
GO:0006635 fatty acid beta-oxidation	27	6	6.58669	-3.63689	0.017143
GO:0006643 membrane lipid metabolism	208	18	2.56501	-3.61561	0.016667
GO:0019395 fatty acid oxidation	39	7	5.32002	-3.54348	0.01875
GO:0006644 phospholipid metabolism	150	14	2.76641	-3.25957	0.032941
GO:0006464 protein modification	1794	85	1.40435	-3.21829	0.031667
GO:0006658 phosphatidylserine metabolism	6	3	14.82	-3.1506	0.041579
GO:0008610 lipid biosynthesis	308	22	2.11715	-3.11211	0.0445
GO:0043170 macromolecule metabolism	4662	188	1.19527	-2.9092	0.101429
GO:0043412 biopolymer modification	1863	86	1.36825	-2.90195	0.098636
GO:0006650 glycerophospholipid metabolism	81	9	3.29334	-2.80038	0.11
GO:0012501 programmed cell death	807	43	1.57934	-2.71298	0.1168
GO:0008654 phospholipid biosynthesis	84	9	3.17572	-2.68931	0.114231
GO:0008219 cell death	838	44	1.55628	-2.64258	0.114643
GO:0016265 death	838	44	1.55628	-2.64258	0.114643
GO:0001573 ganglioside metabolism	9	3	9.88003	-2.56029	0.124516
GO:0008356 asymmetric cell division	9	3	9.88003	-2.56029	0.124516
GO:0046467 membrane lipid biosynthesis	107	10	2.7701	-2.4849	0.124848
GO:0030574 collagen catabolism	19	4	6.24002	-2.48014	0.123529
GO:0015910 peroxisomal long-chain fatty acid import	3	2	19.7601	-2.47743	0.15
GO:0016557 peroxisome membrane biogenesis	3	2	19.7601	-2.47743	0.15
GO:0045046 protein import into peroxisome membrane	3	2	19.7601	-2.47743	0.15
GO:0006897 endocytosis	245	17	2.05666	-2.39981	0.164211
GO:0030163 protein catabolism	309	20	1.91845	-2.38239	0.166
GO:0006118 electron transport	444	26	1.73568	-2.34205	0.163095
GO:0006915 apoptosis	779	40	1.52196	-2.28206	0.176591
GO:0045897 positive regulation of transcription mitotic	4	2	14.82	-2.18621	0.226596
GO:0046022 positive regulation of transcription from RNA polymerase II promoter mitotic	4	2	14.82	-2.18621	0.226596
GO:0006418 tRNA aminoacylation for protein translation	66	7	3.14365	-2.17747	0.2134
GO:0043038 amino acid activation	66	7	3.14365	-2.17747	0.2134
GO:0043039 tRNA aminoacylation	66	7	3.14365	-2.17747	0.2134
GO:0009057 macromolecule catabolism	506	28	1.64016	-2.14997	0.223725
GO:0006512 ubiquitin cycle	512	28	1.62094	-2.08358	0.220182
GO:0046620 regulation of organ size	13	3	6.84002	-2.07186	0.221207
GO:0051603 proteolysis during cellular protein catabolism	265	17	1.90144	-2.06672	0.221695
GO:0009058 biosynthesis	1520	68	1.326	-2.05456	0.218667
GO:0006508 proteolysis	807	40	1.46915	-2.03303	0.220164
GO:0009056 catabolism	809	40	1.46552	-2.0161	0.220806
GO:0001763 morphogenesis of a branching structure	71	7	2.92226	-2.00717	0.215156
GO:0044257 cellular protein catabolism	269	17	1.87317	-2.0056	0.212
GO:0046474 glycerophospholipid biosynthesis	55	6	3.23346	-1.99048	0.209848
GO:0045767 regulation of anti-apoptosis	14	3	6.35145	-1.97799	0.215821
GO:0000098 sulfur amino acid catabolism	5	2	11.856	-1.97414	0.249155
GO:0006927 transformed cell apoptosis	5	2	11.856	-1.97414	0.249155
GO:0051605 proteolysis during protein maturation	5	2	11.856	-1.97414	0.249155
GO:0043285 biopolymer catabolism	407	23	1.67499	-1.95667	0.244521
GO:0006898 receptor mediated endocytosis	56	6	3.17572	-1.95344	0.242432
GO:0009987 cellular process	12281	425	1.02573	-1.94103	0.241467
GO:0043283 biopolymer metabolism	3045	123	1.19728	-1.89196	0.242078
GO:0035265 organ growth	15	3	5.92802	-1.89192	0.235976
GO:0050771 negative regulation of axonogenesis	15	3	5.92802	-1.89192	0.235976
GO:0006468 protein amino acid phosphorylation	658	33	1.48651	-1.82969	0.238941
GO:0044273 sulfur compound catabolism	6	2	9.88003	-1.8078	0.270222
GO:0051604 protein maturation	6	2	9.88003	-1.8078	0.270222
GO:0006399 tRNA metabolism	117	9	2.28001	-1.75854	0.280549
GO:0006665 sphingolipid metabolism	62	6	2.8684	-1.74905	0.280753
GO:0006091 generation of precursor metabolites and energy	720	35	1.44084	-1.72407	0.284271
GO:0006633 fatty acid biosynthesis	81	7	2.56149	-1.71335	0.284536
GO:0048477 oogenesis	100	8	2.37121	-1.70624	0.285204
GO:0007517 muscle development	226	14	1.83611	-1.67328	0.289596
GO:0006513 protein monoubiquitination	7	2	8.4686	-1.67139	0.290545
GO:0006684 sphingomyelin metabolism	7	2	8.4686	-1.67139	0.290545
GO:0006882 zinc ion homeostasis	7	2	8.4686	-1.67139	0.290545
GO:0015909 long-chain fatty acid transport	7	2	8.4686	-1.67139	0.290545
GO:0016203 muscle attachment	7	2	8.4686	-1.67139	0.290545
GO:0048285 organelle fission	7	2	8.4686	-1.67139	0.290545
GO:0051341 regulation of oxidoreductase activity	7	2	8.4686	-1.67139	0.290545
GO:0006672 ceramide metabolism	32	4	3.70501	-1.66204	0.298378
GO:0030334 regulation of cell migration	65	6	2.73601	-1.65707	0.298839
GO:0006687 glycosphingolipid metabolism	19	3	4.68001	-1.60679	0.306496
GO:0006984 ER-nuclear signaling pathway	19	3	4.68001	-1.60679	0.306496
GO:0018346 protein amino acid prenylation	19	3	4.68001	-1.60679	0.306496
GO:0044248 cellular catabolism	711	34	1.41739	-1.59666	0.305763
GO:0044265 cellular macromolecule catabolism	444	23	1.53541	-1.5585	0.312101
GO:0006896 Golgi to vacuole transport	8	2	7.41002	-1.55615	0.324683
GO:0046021 regulation of transcription from RNA polymerase II promoter mitotic	8	2	7.41002	-1.55615	0.324683
GO:0048611 embryonic ectodermal gut development	8	2	7.41002	-1.55615	0.324683
GO:0048613 embryonic ectodermal gut morphogenesis	8	2	7.41002	-1.55615	0.324683
GO:0006725 aromatic compound metabolism	169	11	1.92924	-1.55015	0.323622
GO:0006637 acyl-CoA metabolism	20	3	4.44601	-1.54696	0.327266
GO:0046519 sphingoid metabolism	35	4	3.38744	-1.53296	0.32907
GO:0030100 regulation of endocytosis	52	5	2.85001	-1.51866	0.331077
GO:0001762 beta-alanine transport	1	1	29.6401	-1.47188	0.472299
GO:0001998 angiotensin mediated vasoconstriction during regulation of blood pressure	1	1	29.6401	-1.47188	0.472299
GO:0006214 thymidine catabolism	1	1	29.6401	-1.47188	0.472299
GO:0006294 nucleotide-excision repair preincision complex formation	1	1	29.6401	-1.47188	0.472299
GO:0006565 L-serine catabolism	1	1	29.6401	-1.47188	0.472299
GO:0006655 phosphatidylglycerol biosynthesis	1	1	29.6401	-1.47188	0.472299
GO:0007503 fat body development	1	1	29.6401	-1.47188	0.472299
GO:0007510 cardioblast cell fate determination	1	1	29.6401	-1.47188	0.472299
GO:0010213 non-photoreactive DNA repair	1	1	29.6401	-1.47188	0.472299
GO:0015734 taurine transport	1	1	29.6401	-1.47188	0.472299
GO:0015827 L-tryptophan transport	1	1	29.6401	-1.47188	0.472299
GO:0015919 peroxisomal membrane transport	1	1	29.6401	-1.47188	0.472299
GO:0016024 CDP-diacylglycerol biosynthesis	1	1	29.6401	-1.47188	0.472299
GO:0019464 glycine decarboxylation via glycine cleavage system	1	1	29.6401	-1.47188	0.472299
GO:0019510 S-adenosylhomocysteine catabolism	1	1	29.6401	-1.47188	0.472299
GO:0019637 organophosphate metabolism	1	1	29.6401	-1.47188	0.472299
GO:0030422 RNA interference production of siRNA	1	1	29.6401	-1.47188	0.472299
GO:0030423 RNA interference targeting of mRNA for destruction	1	1	29.6401	-1.47188	0.472299
GO:0031054 pre-microRNA processing	1	1	29.6401	-1.47188	0.472299
GO:0031321 prospore formation	1	1	29.6401	-1.47188	0.472299
GO:0035087 RNA interference siRNA loading onto RISC	1	1	29.6401	-1.47188	0.472299
GO:0035279 miRNA-mediated gene silencing mRNA cleavage	1	1	29.6401	-1.47188	0.472299
GO:0042304 regulation of fatty acid biosynthesis	1	1	29.6401	-1.47188	0.472299
GO:0043362 nucleate erythrocyte maturation	1	1	29.6401	-1.47188	0.472299
GO:0043363 nucleate erythrocyte differentiation	1	1	29.6401	-1.47188	0.472299
GO:0043409 negative regulation of MAPKKK cascade	1	1	29.6401	-1.47188	0.472299
GO:0043574 peroxisomal transport	1	1	29.6401	-1.47188	0.472299
GO:0045723 positive regulation of fatty acid biosynthesis	1	1	29.6401	-1.47188	0.472299
GO:0045967 negative regulation of growth rate	1	1	29.6401	-1.47188	0.472299
GO:0046104 thymidine metabolism	1	1	29.6401	-1.47188	0.472299
GO:0046121 deoxyribonucleoside catabolism	1	1	29.6401	-1.47188	0.472299
GO:0046127 pyrimidine deoxyribonucleoside catabolism	1	1	29.6401	-1.47188	0.472299
GO:0046340 diacylglycerol catabolism	1	1	29.6401	-1.47188	0.472299
GO:0046341 CDP-diacylglycerol metabolism	1	1	29.6401	-1.47188	0.472299
GO:0048033 heme o metabolism	1	1	29.6401	-1.47188	0.472299
GO:0048034 heme o biosynthesis	1	1	29.6401	-1.47188	0.472299
GO:0048823 nucleate erythrocyte development	1	1	29.6401	-1.47188	0.472299
GO:0050757 thymidylate synthase biosynthesis	1	1	29.6401	-1.47188	0.472299
GO:0050758 regulation of thymidylate synthase biosynthesis	1	1	29.6401	-1.47188	0.472299
GO:0050760 negative regulation of thymidylate synthase biosynthesis	1	1	29.6401	-1.47188	0.472299
GO:0050872 white fat cell differentiation	1	1	29.6401	-1.47188	0.472299
GO:0051469 vesicle fusion with vacuole	1	1	29.6401	-1.47188	0.472299
GO:0051972 regulation of telomerase activity	1	1	29.6401	-1.47188	0.472299
GO:0051974 negative regulation of telomerase activity	1	1	29.6401	-1.47188	0.472299
GO:0006777 Mo-molybdopterin cofactor biosynthesis	9	2	6.58669	-1.45667	0.466717
GO:0008535 cytochrome c oxidase complex assembly	9	2	6.58669	-1.45667	0.466717
GO:0009414 response to water deprivation	9	2	6.58669	-1.45667	0.466717
GO:0009626 hypersensitive response	9	2	6.58669	-1.45667	0.466717
GO:0019720 Mo-molybdopterin cofactor metabolism	9	2	6.58669	-1.45667	0.466717
GO:0019827 stem cell maintenance	9	2	6.58669	-1.45667	0.466717
GO:0043545 molybdopterin cofactor metabolism	9	2	6.58669	-1.45667	0.466717
GO:0045598 regulation of fat cell differentiation	9	2	6.58669	-1.45667	0.466717
GO:0045896 regulation of transcription mitotic	9	2	6.58669	-1.45667	0.466717
GO:0051205 protein insertion into membrane	9	2	6.58669	-1.45667	0.466717
GO:0016053 organic acid biosynthesis	93	7	2.23097	-1.42528	0.4742
GO:0046394 carboxylic acid biosynthesis	93	7	2.23097	-1.42528	0.4742
GO:0051188 cofactor biosynthesis	134	9	1.99075	-1.42443	0.472289
GO:0051270 regulation of cell motility	74	6	2.40325	-1.41462	0.475
GO:0046777 protein amino acid autophosphorylation	56	5	2.64644	-1.39829	0.476453
GO:0018342 protein prenylation	23	3	3.8661	-1.38776	0.479167
GO:0045927 positive regulation of growth	39	4	3.04001	-1.38207	0.476942
GO:0016540 protein autoprocessing	57	5	2.60001	-1.37011	0.476618
GO:0006625 protein targeting to peroxisome	10	2	5.92802	-1.3694	0.477664
GO:0045995 regulation of embryonic development	10	2	5.92802	-1.3694	0.477664
GO:0046339 diacylglycerol metabolism	10	2	5.92802	-1.3694	0.477664
GO:0046460 neutral lipid biosynthesis	10	2	5.92802	-1.3694	0.477664
GO:0046463 acylglycerol biosynthesis	10	2	5.92802	-1.3694	0.477664
GO:0048308 organelle inheritance	10	2	5.92802	-1.3694	0.477664
GO:0007229 integrin-mediated signaling pathway	96	7	2.16126	-1.36216	0.477721
GO:0048468 cell development	566	27	1.41393	-1.35427	0.47588
GO:0007005 mitochondrion organization and biogenesis	58	5	2.55518	-1.34263	0.476697
GO:0006638 neutral lipid metabolism	24	3	3.70501	-1.34043	0.471256
GO:0006639 acylglycerol metabolism	24	3	3.70501	-1.34043	0.471256
GO:0006749 glutathione metabolism	24	3	3.70501	-1.34043	0.471256
GO:0016337 cell-cell adhesion	252	14	1.64667	-1.32994	0.471473
GO:0045786 negative regulation of progression through cell cycle	184	11	1.77196	-1.32308	0.469689
GO:0048731 system development	1011	44	1.28997	-1.31821	0.466009
GO:0051186 cofactor metabolism	253	14	1.64016	-1.31815	0.464017
GO:0007582 physiological process	11789	408	1.0258	-1.31812	0.462174
