# Supplementary material for: Transcriptome Alteration in the Diabetic Heart by Rosiglitazone: Implications for Cardiovascular Mortality
Source: PLoS One. 2008 Jul 9;3(7):e2609. doi: 10.1371/journal.pone.0002609 (PMC2481284; doi:10.1371/journal.pone.0002609)
Supplement: Table S4 — Downregulated Gene Ontology pathways in untreated db/db mice. (0.05 MB RTF) [file pone.0002609.s004.xls]

## Sheet: Sheet1
Supplemental Table S4: Downregulated pathways in untreated db/db mice
GO Category	TOTAL GENES	UNDER-EXPRESSED GENES	ENRICHMENT	LOG10(p)	FALSE DISCOVERY RATE
GO:0050794 regulation of cellular process	3953	112	1.46297	-5.85466	0
GO:0051244 regulation of cellular physiological process	3618	102	1.45571	-5.09304	0.005
GO:0048522 positive regulation of cellular process	1071	41	1.97669	-4.73963	0.003333
GO:0050789 regulation of biological process	4390	116	1.36438	-4.5275	0.0075
GO:0006955 immune response	877	35	2.06069	-4.45996	0.008
GO:0050791 regulation of physiological process	3839	104	1.39881	-4.41307	0.005714
GO:0048518 positive regulation of biological process	1275	44	1.78191	-3.97981	0.01125
GO:0006950 response to stress	1513	49	1.67225	-3.72002	0.02
GO:0008283 cell proliferation	847	32	1.95079	-3.67206	0.019167
GO:0045601 regulation of endothelial cell differentiation	7	3	22.1293	-3.62493	0.02
GO:0045597 positive regulation of cell differentiation	68	7	5.31536	-3.47735	0.0225
GO:0048523 negative regulation of cellular process	1243	41	1.70316	-3.31945	0.042381
GO:0006952 defense response	1046	36	1.77711	-3.29474	0.040455
GO:0008037 cell recognition	20	4	10.327	-3.28299	0.03913
GO:0042127 regulation of cell proliferation	526	22	2.15964	-3.23685	0.04
GO:0051242 positive regulation of cellular physiological process	948	33	1.79742	-3.13796	0.0424
GO:0043119 positive regulation of physiological process	992	34	1.76974	-3.10214	0.046296
GO:0006916 anti-apoptosis	182	11	3.12079	-3.07602	0.045357
GO:0048519 negative regulation of biological process	1370	43	1.62066	-3.01852	0.047241
GO:0048514 blood vessel morphogenesis	193	11	2.94292	-2.86858	0.075
GO:0051093 negative regulation of development	112	8	3.68821	-2.8273	0.078485
GO:0045603 positive regulation of endothelial cell differentiation	4	2	25.8175	-2.66062	0.112286
GO:0009887 organ morphogenesis	779	27	1.78966	-2.62132	0.117222
GO:0043066 negative regulation of apoptosis	241	12	2.57103	-2.58436	0.117568
GO:0043069 negative regulation of programmed cell death	244	12	2.53942	-2.54042	0.123684
GO:0051240 positive regulation of organismal physiological process	126	8	3.27841	-2.50567	0.12359
GO:0045321 immune cell activation	215	11	2.64179	-2.50076	0.12075
GO:0051243 negative regulation of cellular physiological process	1085	34	1.61805	-2.4557	0.125122
GO:0001775 cell activation	219	11	2.59354	-2.43983	0.133478
GO:0045595 regulation of cell differentiation	219	11	2.59354	-2.43983	0.133478
GO:0002009 morphogenesis of an epithelium	158	9	2.94123	-2.43761	0.130851
GO:0019222 regulation of metabolism	2548	67	1.35775	-2.41132	0.1242
GO:0042981 regulation of apoptosis	574	21	1.88908	-2.40701	0.122157
GO:0043118 negative regulation of physiological process	1135	35	1.59227	-2.40367	0.12
GO:0008645 hexose transport	34	4	6.0747	-2.39415	0.121852
GO:0015749 monosaccharide transport	34	4	6.0747	-2.39415	0.121852
GO:0001568 blood vessel development	224	11	2.53564	-2.36597	0.121818
GO:0031323 regulation of cellular metabolism	2429	64	1.36049	-2.33156	0.120175
GO:0001944 vasculature development	227	11	2.50213	-2.32285	0.120345
GO:0043067 regulation of programmed cell death	585	21	1.85356	-2.31318	0.119153
GO:0000074 regulation of progression through cell cycle	625	22	1.81755	-2.30058	0.119
GO:0051726 regulation of cell cycle	627	22	1.81175	-2.28452	0.118197
GO:0030335 positive regulation of cell migration	19	3	8.15288	-2.25737	0.135538
GO:0045446 endothelial cell differentiation	19	3	8.15288	-2.25737	0.135538
GO:0001569 patterning of blood vessels	20	3	7.74524	-2.19297	0.143182
GO:0007049 cell cycle	1007	31	1.58956	-2.16742	0.142353
GO:0050853 B cell receptor signaling pathway	7	2	14.7528	-2.13327	0.158551
GO:0030334 regulation of cell migration	65	5	3.97192	-2.07513	0.165915
GO:0046649 lymphocyte activation	181	9	2.56748	-2.05874	0.168333
GO:0001836 release of cytochrome c from mitochondria	8	2	12.9087	-2.01389	0.184286
GO:0008333 endosome to lysosome transport	8	2	12.9087	-2.01389	0.184286
GO:0046324 regulation of glucose import	8	2	12.9087	-2.01389	0.184286
GO:0009725 response to hormone stimulus	68	5	3.79669	-1.99428	0.184359
GO:0001525 angiogenesis	155	8	2.66503	-1.97367	0.185823
GO:0031325 positive regulation of cellular metabolism	436	16	1.89486	-1.96166	0.186296
GO:0001935 endothelial cell proliferation	9	2	11.4744	-1.91029	0.191778
GO:0030890 positive regulation of B cell proliferation	9	2	11.4744	-1.91029	0.191778
GO:0046323 glucose import	9	2	11.4744	-1.91029	0.191778
GO:0050927 positive regulation of positive chemotaxis	9	2	11.4744	-1.91029	0.191778
GO:0050930 induction of positive chemotaxis	9	2	11.4744	-1.91029	0.191778
GO:0006350 transcription	2213	57	1.32995	-1.90471	0.18989
GO:0048731 system development	1011	30	1.53219	-1.9001	0.188913
GO:0001934 positive regulation of protein amino acid phosphorylation	26	3	5.95787	-1.87188	0.193298
GO:0045764 positive regulation of amino acid metabolism	26	3	5.95787	-1.87188	0.193298
GO:0046651 lymphocyte proliferation	73	5	3.53664	-1.86926	0.192211
GO:0050778 positive regulation of immune response	101	6	3.06742	-1.86461	0.191042
GO:0048771 tissue remodeling	131	7	2.75912	-1.86074	0.19
GO:0051270 regulation of cell motility	74	5	3.48885	-1.84559	0.19
GO:0043405 regulation of MAPK activity	103	6	3.00786	-1.82596	0.193939
GO:0043123 positive regulation of I-kappaB kinase NF-kappaB cascade	75	5	3.44233	-1.82234	0.1932
GO:0019217 regulation of fatty acid metabolism	10	2	10.327	-1.81892	0.199245
GO:0050918 positive chemotaxis	10	2	10.327	-1.81892	0.199245
GO:0050921 positive regulation of chemotaxis	10	2	10.327	-1.81892	0.199245
GO:0050926 regulation of positive chemotaxis	10	2	10.327	-1.81892	0.199245
GO:0050776 regulation of immune response	166	8	2.48843	-1.80797	0.198785
GO:0030518 steroid hormone receptor signaling pathway	50	4	4.13079	-1.80242	0.198056
GO:0045596 negative regulation of cell differentiation	76	5	3.39703	-1.79949	0.197982
GO:0050875 cellular physiological process	10110	210	1.07254	-1.79863	0.196273
GO:0006915 apoptosis	779	24	1.59081	-1.78381	0.195676
GO:0030099 myeloid cell differentiation	106	6	2.92273	-1.76987	0.197522
GO:0008285 negative regulation of cell proliferation	237	10	2.17869	-1.76399	0.196316
GO:0008284 positive regulation of cell proliferation	239	10	2.16046	-1.74117	0.199483
GO:0006614 SRP-dependent cotranslational protein targeting to membrane	11	2	9.38817	-1.73729	0.207107
GO:0006893 Golgi to plasma membrane transport	11	2	9.38817	-1.73729	0.207107
GO:0045656 negative regulation of monocyte differentiation	11	2	9.38817	-1.73729	0.207107
GO:0045930 negative regulation of progression through mitotic cell cycle	11	2	9.38817	-1.73729	0.207107
GO:0048545 response to steroid hormone stimulus	11	2	9.38817	-1.73729	0.207107
GO:0009893 positive regulation of metabolism	463	16	1.78436	-1.73673	0.205492
GO:0031214 biomineral formation	108	6	2.86861	-1.7337	0.204065
GO:0009967 positive regulation of signal transduction	140	7	2.58175	-1.71691	0.205
GO:0002028 regulation of sodium ion transport	1	1	51.6349	-1.71294	0.290694
GO:0006992 sterol depletion response sterol regulatory element binding-protein cleavage	1	1	51.6349	-1.71294	0.290694
GO:0007521 muscle cell fate determination	1	1	51.6349	-1.71294	0.290694
GO:0015761 mannose transport	1	1	51.6349	-1.71294	0.290694
GO:0015939 pantothenate metabolism	1	1	51.6349	-1.71294	0.290694
GO:0015940 pantothenate biosynthesis	1	1	51.6349	-1.71294	0.290694
GO:0019368 fatty acid elongation unsaturated fatty acid	1	1	51.6349	-1.71294	0.290694
GO:0030328 prenylcysteine catabolism	1	1	51.6349	-1.71294	0.290694
GO:0030329 prenylcysteine metabolism	1	1	51.6349	-1.71294	0.290694
GO:0030913 paranodal junction assembly	1	1	51.6349	-1.71294	0.290694
GO:0030967 ER-nuclear sterol response pathway	1	1	51.6349	-1.71294	0.290694
GO:0031954 positive regulation of protein amino acid autophosphorylation	1	1	51.6349	-1.71294	0.290694
GO:0042222 interleukin-1 biosynthesis	1	1	51.6349	-1.71294	0.290694
GO:0042271 susceptibility to natural killer cell mediated cytotoxicity	1	1	51.6349	-1.71294	0.290694
GO:0043330 response to exogenous dsRNA	1	1	51.6349	-1.71294	0.290694
GO:0044007 dissemination or transmission of organism from host	1	1	51.6349	-1.71294	0.290694
GO:0045360 regulation of interleukin-1 biosynthesis	1	1	51.6349	-1.71294	0.290694
GO:0045362 positive regulation of interleukin-1 biosynthesis	1	1	51.6349	-1.71294	0.290694
GO:0045631 regulation of mechanoreceptor differentiation	1	1	51.6349	-1.71294	0.290694
GO:0045632 negative regulation of mechanoreceptor differentiation	1	1	51.6349	-1.71294	0.290694
GO:0048638 regulation of developmental growth	1	1	51.6349	-1.71294	0.290694
GO:0048639 positive regulation of developmental growth	1	1	51.6349	-1.71294	0.290694
GO:0051794 regulation of catagen	1	1	51.6349	-1.71294	0.290694
GO:0051795 positive regulation of catagen	1	1	51.6349	-1.71294	0.290694
GO:0051797 regulation of hair follicle development	1	1	51.6349	-1.71294	0.290694
GO:0051798 positive regulation of hair follicle development	1	1	51.6349	-1.71294	0.290694
GO:0051821 dissemination or transmission of organism from other organism during symbiotic interaction	1	1	51.6349	-1.71294	0.290694
GO:0051890 regulation of cardioblast differentiation	1	1	51.6349	-1.71294	0.290694
GO:0051891 positive regulation of cardioblast differentiation	1	1	51.6349	-1.71294	0.290694
GO:0001819 positive regulation of cytokine production	54	4	3.82481	-1.69057	0.294457
GO:0008219 cell death	838	25	1.54042	-1.68335	0.291864
GO:0016265 death	838	25	1.54042	-1.68335	0.291864
GO:0016485 protein processing	111	6	2.79108	-1.68115	0.290562
GO:0001817 regulation of cytokine production	82	5	3.14847	-1.6703	0.289721
GO:0035050 embryonic heart tube development	31	3	4.99693	-1.66477	0.288619
GO:0043122 regulation of I-kappaB kinase NF-kappaB cascade	83	5	3.11054	-1.65	0.293696
GO:0051239 regulation of organismal physiological process	359	13	1.86979	-1.64181	0.293351
GO:0009306 protein secretion	56	4	3.68821	-1.63851	0.290963
GO:0046777 protein amino acid autophosphorylation	56	4	3.68821	-1.63851	0.290963
GO:0015758 glucose transport	32	3	4.84077	-1.62813	0.292979
GO:0012501 programmed cell death	807	24	1.53561	-1.61995	0.292222
GO:0048598 embryonic morphogenesis	215	9	2.16146	-1.61466	0.291263
GO:0016540 protein autoprocessing	57	4	3.6235	-1.61336	0.28901
GO:0030522 intracellular receptor-mediated signaling pathway	57	4	3.6235	-1.61336	0.28901
GO:0001501 skeletal development	251	10	2.05717	-1.61057	0.287668
GO:0009966 regulation of signal transduction	481	16	1.71759	-1.60027	0.287629
GO:0006929 substrate-bound cell migration	13	2	7.94383	-1.59659	0.285123
GO:0009595 detection of biotic stimulus	13	2	7.94383	-1.59659	0.285123
GO:0009743 response to carbohydrate stimulus	13	2	7.94383	-1.59659	0.285123
GO:0042116 macrophage activation	13	2	7.94383	-1.59659	0.285123
GO:0046620 regulation of organ size	13	2	7.94383	-1.59659	0.285123
GO:0048705 skeletal morphogenesis	13	2	7.94383	-1.59659	0.285123
GO:0050714 positive regulation of protein secretion	13	2	7.94383	-1.59659	0.285123
GO:0050920 regulation of chemotaxis	13	2	7.94383	-1.59659	0.285123
GO:0000278 mitotic cell cycle	404	14	1.78933	-1.58733	0.284951
GO:0006959 humoral immune response	183	8	2.25726	-1.58211	0.28372
GO:0042060 wound healing	150	7	2.40963	-1.57222	0.283173
GO:0048513 organ development	1476	39	1.36434	-1.56816	0.282201
GO:0008643 carbohydrate transport	59	4	3.50067	-1.56472	0.281952
GO:0045449 regulation of transcription	2121	53	1.29026	-1.56252	0.280758
GO:0043009 embryonic development (sensu Vertebrata)	119	6	2.60344	-1.55037	0.282972
GO:0051329 interphase of mitotic cell cycle	152	7	2.37792	-1.545	0.28216
GO:0042311 vasodilation	14	2	7.37642	-1.53515	0.290605
GO:0045884 regulation of survival gene product activity	14	2	7.37642	-1.53515	0.290605
GO:0051325 interphase	153	7	2.36238	-1.5316	0.289355
GO:0016126 sterol biosynthesis	35	3	4.42585	-1.526	0.290505
GO:0009611 response to wounding	533	17	1.64689	-1.51809	0.290091
GO:0016481 negative regulation of transcription	377	13	1.78052	-1.49223	0.293108
GO:0050878 regulation of body fluids	123	6	2.51878	-1.48964	0.292242
GO:0006273 lagging strand elongation	15	2	6.88466	-1.47849	0.295197
GO:0007041 lysosomal transport	15	2	6.88466	-1.47849	0.295197
GO:0017015 regulation of transforming growth factor beta receptor signaling pathway	15	2	6.88466	-1.47849	0.295197
GO:0030888 regulation of B cell proliferation	15	2	6.88466	-1.47849	0.295197
GO:0035265 organ growth	15	2	6.88466	-1.47849	0.295197
GO:0042490 mechanoreceptor differentiation	15	2	6.88466	-1.47849	0.295197
GO:0019219 regulation of nucleobase nucleoside nucleotide and nucleic acid metabolism	2195	54	1.27029	-1.47098	0.293896
GO:0048469 cell maturation	125	6	2.47848	-1.46034	0.296121
GO:0016197 endosome transport	64	4	3.22718	-1.45195	0.295598
GO:0051241 negative regulation of organismal physiological process	64	4	3.22718	-1.45195	0.295598
GO:0048534 hemopoietic or lymphoid organ development	268	10	1.92668	-1.44257	0.295574
GO:0000187 activation of MAPK activity	65	4	3.17753	-1.43078	0.297131
GO:0048589 developmental growth	65	4	3.17753	-1.43078	0.297131
GO:0002052 positive regulation of neuroblast proliferation	2	1	25.8175	-1.41612	0.342188
GO:0006358 regulation of global transcription from RNA polymerase II promoter	2	1	25.8175	-1.41612	0.342188
GO:0006600 creatine metabolism	2	1	25.8175	-1.41612	0.342188
GO:0006601 creatine biosynthesis	2	1	25.8175	-1.41612	0.342188
GO:0006922 cleavage of lamin	2	1	25.8175	-1.41612	0.342188
GO:0006923 cleavage of cytoskeletal proteins	2	1	25.8175	-1.41612	0.342188
GO:0009445 putrescine metabolism	2	1	25.8175	-1.41612	0.342188
GO:0009446 putrescine biosynthesis	2	1	25.8175	-1.41612	0.342188
GO:0009735 response to cytokinin stimulus	2	1	25.8175	-1.41612	0.342188
GO:0009756 carbohydrate mediated signaling	2	1	25.8175	-1.41612	0.342188
GO:0017001 antibiotic catabolism	2	1	25.8175	-1.41612	0.342188
GO:0018318 protein amino acid palmitoylation	2	1	25.8175	-1.41612	0.342188
GO:0030007 potassium ion homeostasis	2	1	25.8175	-1.41612	0.342188
GO:0030220 platelet formation	2	1	25.8175	-1.41612	0.342188
GO:0030237 female sex determination	2	1	25.8175	-1.41612	0.342188
GO:0030327 prenylated protein catabolism	2	1	25.8175	-1.41612	0.342188
GO:0030858 positive regulation of epithelial cell differentiation	2	1	25.8175	-1.41612	0.342188
GO:0030878 thyroid gland development	2	1	25.8175	-1.41612	0.342188
GO:0031296 B cell costimulation	2	1	25.8175	-1.41612	0.342188
GO:0031952 regulation of protein amino acid autophosphorylation	2	1	25.8175	-1.41612	0.342188
GO:0035103 sterol regulatory element binding-protein cleavage	2	1	25.8175	-1.41612	0.342188
GO:0035117 embryonic arm morphogenesis	2	1	25.8175	-1.41612	0.342188
GO:0035140 arm morphogenesis	2	1	25.8175	-1.41612	0.342188
GO:0042118 endothelial cell activation	2	1	25.8175	-1.41612	0.342188
GO:0042637 catagen	2	1	25.8175	-1.41612	0.342188
GO:0042761 very-long-chain fatty acid biosynthesis	2	1	25.8175	-1.41612	0.342188
GO:0042985 negative regulation of amyloid precursor protein biosynthesis	2	1	25.8175	-1.41612	0.342188
GO:0043536 positive regulation of blood vessel endothelial cell migration	2	1	25.8175	-1.41612	0.342188
GO:0045366 regulation of interleukin-13 biosynthesis	2	1	25.8175	-1.41612	0.342188
GO:0045368 positive regulation of interleukin-13 biosynthesis	2	1	25.8175	-1.41612	0.342188
GO:0045616 regulation of keratinocyte differentiation	2	1	25.8175	-1.41612	0.342188
GO:0045721 negative regulation of gluconeogenesis	2	1	25.8175	-1.41612	0.342188
GO:0045887 positive regulation of synaptic growth at neuromuscular junction	2	1	25.8175	-1.41612	0.342188
GO:0045907 positive regulation of vasoconstriction	2	1	25.8175	-1.41612	0.342188
GO:0045908 negative regulation of vasodilation	2	1	25.8175	-1.41612	0.342188
GO:0045986 negative regulation of smooth muscle contraction	2	1	25.8175	-1.41612	0.342188
GO:0046853 inositol and derivative phosphorylation	2	1	25.8175	-1.41612	0.342188
GO:0046854 phosphoinositide phosphorylation	2	1	25.8175	-1.41612	0.342188
GO:0048172 regulation of short-term neuronal synaptic plasticity	2	1	25.8175	-1.41612	0.342188
GO:0051280 negative regulation of release of sequestered calcium ion into cytosol	2	1	25.8175	-1.41612	0.342188
GO:0051881 regulation of mitochondrial membrane potential	2	1	25.8175	-1.41612	0.342188
GO:0051247 positive regulation of protein metabolism	96	5	2.68932	-1.4132	0.341522
GO:0045927 positive regulation of growth	39	3	3.97192	-1.40531	0.342483
GO:0045637 regulation of myeloid cell differentiation	40	3	3.87262	-1.37751	0.344863
GO:0007043 intercellular junction assembly	17	2	6.0747	-1.3771	0.347763
GO:0008637 apoptotic mitochondrial changes	17	2	6.0747	-1.3771	0.347763
GO:0007507 heart development	166	7	2.17738	-1.36879	0.348784
GO:0042035 regulation of cytokine biosynthesis	69	4	2.99333	-1.35023	0.350774
GO:0043065 positive regulation of apoptosis	279	10	1.85071	-1.34341	0.350906
GO:0006613 cotranslational protein targeting to membrane	18	2	5.73721	-1.33141	0.352881
GO:0042044 fluid transport	18	2	5.73721	-1.33141	0.352881
GO:0045638 negative regulation of myeloid cell differentiation	18	2	5.73721	-1.33141	0.352881
GO:0043406 positive regulation of MAPK activity	70	4	2.95057	-1.33106	0.352343
GO:0006357 regulation of transcription from RNA polymerase II promoter	607	18	1.53118	-1.31778	0.353158
GO:0030097 hemopoiesis	245	9	1.89679	-1.30751	0.35423
GO:0045934 negative regulation of nucleobase nucleoside nucleotide and nucleic acid metabolism	402	13	1.66979	-1.30569	0.353203
GO:0006351 transcription DNA-dependent	2059	50	1.25388	-1.30296	0.352769
